# Supplementary material
Source: bioRxiv or medRxiv preprint supplement (https://medrxiv.org/highwire/filestream/76454/field_highwire_adjunct_files/0/2020.04.11.20062133-1.pdf)
Supplement: Supplementary file [file 2020.04.11.20062133-1.pdf]

**Supplementary Information for:**

**Title: Intervention strategies against COVID-19 and their estimated impact on Swedish healthcare capacity**

**Authors:**

Jasmine M GARDNER (0000-0002-6399-8504), Lander WILLEM (0000-0002-9210-1196), Wouter VAN DER WIJNGAART (0000-0001-8248-6670), Shina Caroline Lynn KAMERLIN (0000-0002-3190-1173), Nele BRUSSELAERS (0000-0003-0137-447X), Peter KASSON (0000-0002-3111-8103)

**Address for each author**

JMG: Science for Life Laboratory, Department of Chemistry – BMC, Uppsala University, BMC Box 576, S-751 23 Uppsala, Sweden, [j.gardner@kemi.uu.se](mailto:j.gardner@kemi.uu.se)

LW: Centre for Health Economic Research and Modelling Infectious Diseases, University of Antwerp, Universiteitsplein 1, 2610 Wilrijk, Belgium, [lander.willem@uantwerpen.be](mailto:lander.willem@uantwerpen.be)

WVDW: School of Electrical Engineering and Computer Science, KTH Royal Institute of Technology, Malvinas väg 10, SE-100 44 Stockholm, Sweden, [wouter@kth.se](mailto:wouter@kth.se)

SCLK: Science for Life Laboratory, Department of Chemistry – BMC, Uppsala University, BMC Box 576, S-751 23 Uppsala, Sweden, [lynn.kamerlin@kemi.uu.se](mailto:lynn.kamerlin@kemi.uu.se)

NB: Centre for Translational Microbiome Research (CTMR), Dept. of Microbiology, Tumour and Cell Biology, Karolinska Institutet, Sweden; Ghent University, Belgium, [nele.brusselaers@ki.se](mailto:nele.brusselaers@ki.se)

PK: Science for Life Laboratory, Dept. of Cell and Molecular Biology, Uppsala University, Uppsala 75124 Sweden and Departments of Molecular Physiology and Biomedical Engineering, University of Virginia, USA, [kassonlab@gmail.com](mailto:kassonlab@gmail.com)

## Supplementary methods

Household transmission ( $T_h$ ) is calculated as

$$\sum_{k(h_k==h_i)} \frac{I_k \beta_h \kappa(t - \tau_k) [1 + C_k(\omega - 1)]}{n_i^\alpha} \quad (1)$$

where  $h_i$  is the household of individual  $i$ ,  $I_i$  is 1 if individual  $i$  is infectious and 0 otherwise,  $\beta_h$  is 1.1 to reflect approximately 1/3 of overall transmission propagating from the household,  $\kappa(t-\tau)$  is the time-dependent strength of infection described by a log-normal distribution with a mean of -0.72 and a standard deviation of 1.8,<sup>1</sup>  $C_k$  is 1 if individual  $k$  has a severe infection and 0 otherwise,  $\omega$  is 2 (to account for severe infections being twice as infectious),<sup>1</sup>  $n_i$  is the population of household  $i$ , and  $\alpha$  is 0.8 and represents a determining factor for household transmission.<sup>1</sup>

Community transmission ( $T_c$ ) is calculated as:

$$\frac{\sum_k I_k \zeta(a_i) \beta_c \kappa(t - \tau_k) f(d_{i,k}) [1 + C_k(\omega - 1)]}{\sum_k f(d_{i,k})} \quad (2)$$

where  $\zeta(a_i)$  is a factor to account for different travel rates of individuals  $i$  with age  $a$ . In this study, the parameter is 0.1 when age is less than 5, 0.25 for ages 5-10, 0.50 for ages 10-15, 1.0 for ages 20-65, 0.75 for ages 10-15, 0.75 for ages 65-70, 0.5 for ages 70-75, 0.25 for ages over 75. A gravity-based density kernel  $f(d_{i,k})$  is used as described in Ferguson 2005 with data as parameterized for Great Britain,<sup>2</sup> and  $\beta_c$  is set to 0.865 to account for 1/3 of transmission from the community.

Workplace and school transmission ( $T_w$ ) is calculated as:

$$\sum_{j,k(l_k^j==l_i^j)} \frac{I_k \beta_p^j \kappa(t - \tau_k) [1 + C_k(\omega \psi_p^j - 1)]}{m_i^j} \quad (3)$$

where  $\beta_p$  is 1.254 for schools, 0.627 for workplaces, and 0.156 for hospitals to account for 75% decrease in infection spread from strict safety measures and 1/3 transmission occurring in schools and workplaces. The factor  $y_p$  accounts for workplace absence during severe infections and is 0.1 for preschools, 0.2 for elementary schools, 0.25 for high schools, and 0.5 for workplaces.<sup>1</sup>  $M_i$  is the number of members of the workplace.

The parameterization procedure described in the Methods yielded an additional scaling factor of 1.8 for all  $\beta$  values to yield a 5-day doubling time, which matched the doubling time for reported COVID-19 deaths in Sweden over the parameterization window, and a scaling factor of 2.2 to yield a 3-day doubling time, which is most consistent with epidemiological data for the rest of Europe.

Infectiousness is an additive property where  $\lambda_i = T_h + T_w + T_c$ . Infection is determined through a Monte Carlo determination with probability  $1 - \exp(-\lambda_i dt)$ . If a person is infectious, they are assigned as asymptomatic with a 33% probability<sup>3</sup> and severe with 50% probability.<sup>1</sup> Individuals are infectious from 4.6 days after initial infection and symptoms appear after 5.1 days.<sup>3</sup>

Five days after appearance of symptoms, individuals enter the hospital randomly at a rate dependent on age. These percentages are 0.1 for ages 0-9, 0.3 for ages 10-19, 1.2 for ages 20-29, 3.2 for ages 30-39, 4.9 for ages 40-49, 10.2 for ages 50-59, 16.6 for ages 60-69, 24.3 for ages 70-79, and 0.273 for ages 80 and over.<sup>3</sup> ICU entry is similarly based on age and determined randomly from patients admitted to the hospital. The probability of ICU commitment after hospital entry is 5 for ages less than 40, 6.3 for ages 40-50, 12.2 for ages 50-60, 27.4 for ages 60-70, 43.2 for ages 70-80, and 70.9 for ages over 80.<sup>3,4</sup>

Ten days after onset of symptoms, symptomatic individuals die with a percentage determined by age. These percentages are .00161% for ages 0-10, 0.00695% for ages 10-20, 0.0309% for ages 20-30, 0.0844% for ages 30-40, 0.161% for ages 40-50, 0.595% for ages 50-60,

1.93% for ages 60-70, 4.28% for ages 70-80, and 7.8% for ages above 80.<sup>4</sup> These numbers were intentionally set conservatively. ICU patients die with 50% probability regardless of age.<sup>3</sup>

Individuals in the community recover 11 days after onset of symptoms, and those in the hospital are discharged and recover after 8 days of hospitalisation. Individuals in the ICU are transferred to the general hospital after 10 days and discharged from the hospital 5 days after that.

## References

1. Ferguson NM, Cummings DA, Cauchemez S, et al. Strategies for containing an emerging influenza pandemic in Southeast Asia. *Nature* 2005;437:209-14.
2. Ferguson NM, Cummings DA, Fraser C, et al. Strategies for mitigating an influenza pandemic. *Nature* 2006;442:448-52.
3. Ferguson NM, Laydon D, Nedjati-Gilani G, et al. Impact of non-pharmaceutical interventions (NPIs) to reduce COVID-19 mortality and healthcare demand. 2020:DOI: 10.25561/77482.
4. Verity R, Okell LC, Dorigatti I, et al. Estimates of the severity of COVID-19 disease: a model-based analysis. *Lancet Infect Dis* 2020;Online First:DOI: 10.1016/S1473-3099(20)30243-7.
